# Supplementary material for: Solid Lipid Microparticles by Spray Congealing of Water/Oil Emulsion: An Effective/Versatile Loading Strategy for a Highly Soluble Drug
Source: MDPI journal article supplement (doi:10.3390/pharmaceutics14122805), 2022-12-14
Supplement: s1 [file s1]

## ADDITIONAL DOCUMENTATION

Table S1: Coefficient estimation for equation 6

| Factor                 | Coefficient Estimate | 95% CI Low | 95% CI High |
|------------------------|----------------------|------------|-------------|
| Intercept              | 31.48                | 28.29      | 34.67       |
| A-API Amount           | 21.95                | 18.15      | 25.76       |
| B-API:H <sub>2</sub> O | -7.24                | -11.05     | -3.44       |
| AB                     | -10.71               | -15.24     | -6.17       |

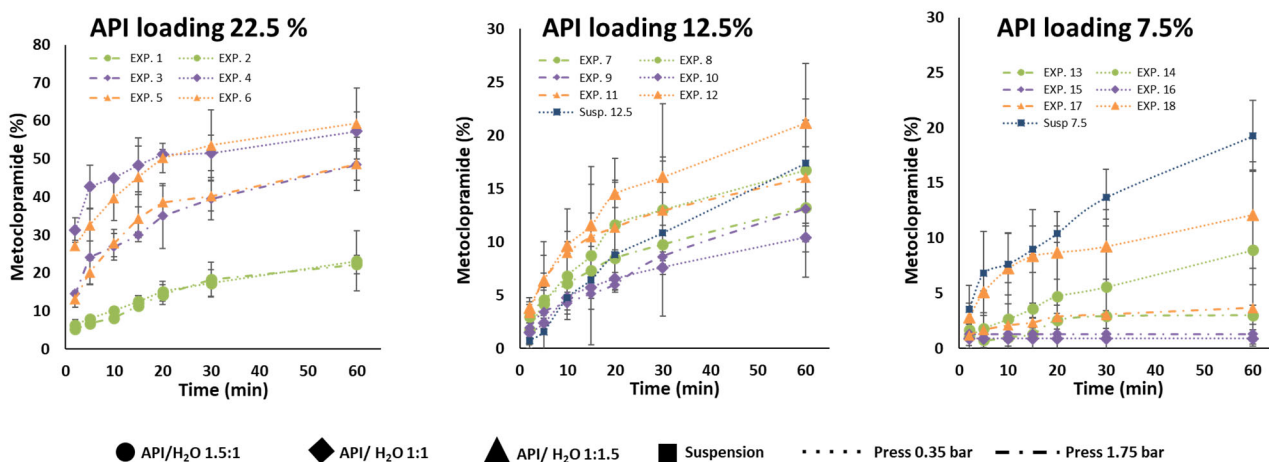

Figure S1: zoom on the first 60 minutes of the *in vitro* release profiles of experiments with the same API amount

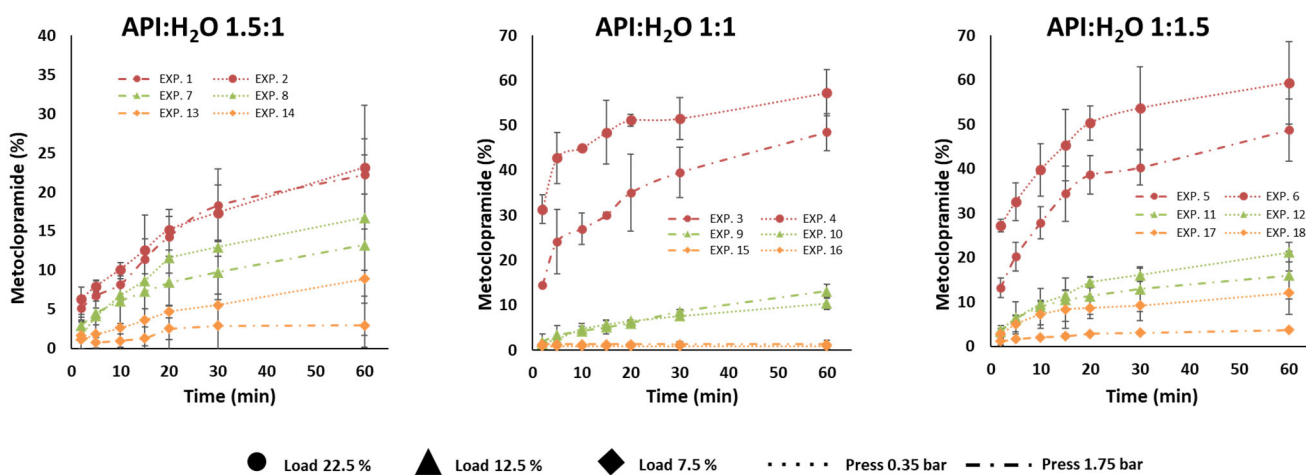

Figure S2: zoom on the first 60 minutes of the *in vitro* release profiles of experiments with the same API:H<sub>2</sub>O ratio

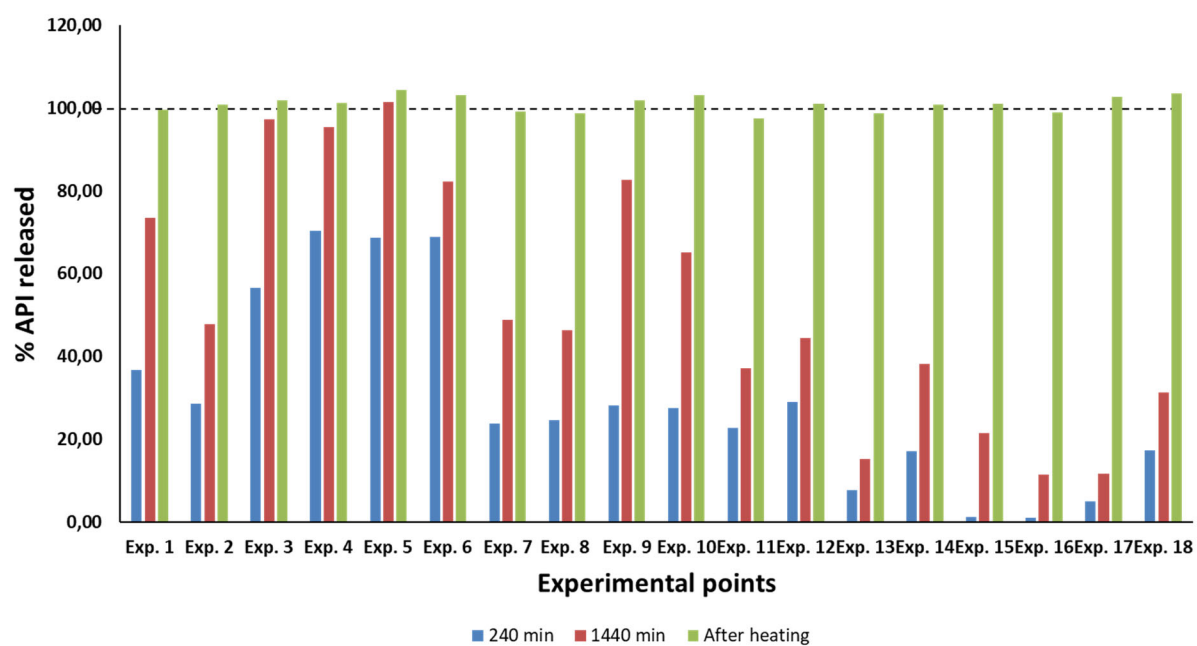

Figure S3: percentages of API in solution after 240 and 1440 min, and after sample heating

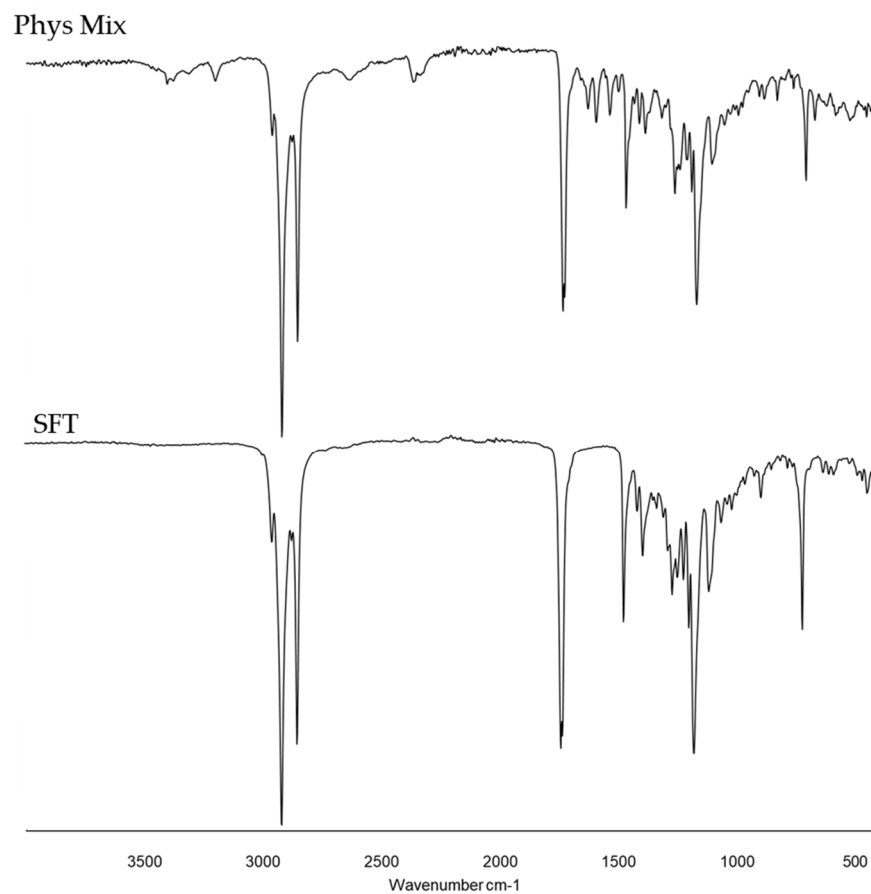

Figure S4: IR spectra of SFT and of drug-excipient physical mixture.
